# Supplementary material for: FlgN Is Required for Flagellum-Based Motility by Bacillus subtilis
Source: PubMed Central journal article supplement (PMC4054197; doi:10.1128/jb.01599-14), 2014-06
Supplement: JB.01599-14_zjb999093185so1.pdf [file JB.01599-14_zjb999093185so1.pdf]

1 **Supplemental Information.**

2 **FlgN function in flagellar based motility by *Bacillus subtilis***

3

4 **Lynne S. Cairns <sup>1</sup>, Victoria L. Marlow <sup>1</sup>, Taryn B. Kiley <sup>1</sup>, Christopher Birchall <sup>2</sup>, Adam Ostrowski <sup>1</sup>,**  
5 **Phillip D. Aldridge <sup>2</sup> and Nicola R. Stanley-Wall <sup>1</sup>**

6

7 <sup>1</sup> Division of Molecular Microbiology, College of Life Sciences, University of Dundee, Dundee, UK  
8 DD1 5EH

9 <sup>2</sup> Centre for Bacterial Cell Biology, Medical Sciences New Building, Newcastle University, Richardson  
10 Road, Newcastle upon Tyne, UK

11

12 \*Running Title: The function of FlgN in *Bacillus subtilis*.

13

14 To whom correspondence should be addressed:

15 Nicola R. Stanley-Wall

16 Division of Molecular Microbiology, College of Life Sciences, University of Dundee, Dundee DD1 5EH.

17 Email: [n.r.stanleywall@dundee.ac.uk](mailto:n.r.stanleywall@dundee.ac.uk) Tel: +44(0)1382 385136; Fax: +44(0)1382 388216;

18

19

20

21

22 **Figure S1 Amino Acids Identified in Mass Spectrometry Identification of Hag.** The protein sequence  
23 of Hag is shown with amino acids from peptide sequences which were identified by mass  
24 spectrometry analysis in the identification of Hag in whole cell lysates highlighted in bold.

25 **Figure S2 Western Blot Analysis of FlgE.** Western blot analysis of cellular (including assembled  
26 flagella) fractions of the wild-type (NCIB3610),  $\Delta flgE$  (NRS4042),  $\Delta hag$  (DS1677),  $\DeltafliD$  (NRS4041),  
27  $\Delta flgN$  (NRS3570) and  $\Delta flgK-flgL$  (NRS4060) probed with the  $\alpha$ -FlgE antibody.

28 **Figure S3 Characterisation of His-tagged FlgK Strains and Enrichment of Hook-Basal Bodies.** (A)  
29 swimming expansion assay of wild-type (NCIB3610),  $\Delta flgK-flgL$  (NRS4060), His-*flgK* (NRS4812) and  
30 *flgK*-His (NRS4801). Photographs were taken after 24 hours incubation at room temperature. (B)  
31 Coomassie stained SDS-PAGE gel analysis of flagellar hook-basal body proteins enriched from the  
32 wild-type strain (NCIB3610). Mass spectrometry analysis of this sample is detailed in Table S4.

33

34

35 Table S1 Strains used in this study.

| Strain          | Relevant Genotype <sup>a</sup>                                                                                           | Source <sup>b</sup> |
|-----------------|--------------------------------------------------------------------------------------------------------------------------|---------------------|
| NCIB3610<br>168 | Prototroph<br><i>trpC2</i>                                                                                               | B.G.S.C.<br>(1)     |
| NRS1314         | 3610 <i>degU::pBL204 (cml)</i>                                                                                           | (2)                 |
| DS1677          | 3610 $\Delta$ <i>hag</i>                                                                                                 | Kind gift D. Kearns |
| NRS1467         | 3610 <i>amyE::Phy-spank-gfp-lacI (spc)</i>                                                                               | (2)                 |
| NRS2544         | 3610 $\Delta$ <i>ptkA</i>                                                                                                | (3)                 |
| NRS3070         | 168 <i>sacA::Phag-yfp (kan)</i>                                                                                          | pNW546 →168         |
| NRS3076         | 3610 <i>sacA::Phag-yfp (kan)</i>                                                                                         | SPP1 3070 →3610     |
| NRS3256         | 168 <i>amyE::P<sub>hy-spank</sub>-flgN-lacI (spc)</i>                                                                    | pNW380 →3610        |
| NRS3570         | 3610 $\Delta$ <i>flgN</i>                                                                                                | pNW399 →3610        |
| NRS3571         | 3610 <i>flgN</i> Y <sup>49</sup> A                                                                                       | pNW801 →3610        |
| NRS3578         | 3610 $\Delta$ <i>flgN</i> + <i>amyE::P<sub>hy-spank</sub>-flgN-lacI (spc)</i>                                            | SPP1 3256 →NRS3570  |
| NRS3708         | 3610 $\Delta$ <i>flgN</i> + <i>sacA::P<sub>hag</sub>-yfp (kan)</i>                                                       | SPP1 3070 →NRS3570  |
| NRS3713         | 3610 $\Delta$ <i>flgN</i> + <i>sacA::P<sub>hag</sub>-yfp (kan)</i> + <i>amyE::P<sub>hy-spank</sub>-flgN-lacI (spc)</i>   | SPP1 3256 →NRS3708  |
| NRS3718         | 3610 $\Delta$ <i>flgN</i> <i>hag</i> T <sup>209</sup> C                                                                  | pNW1010 →NRS3570    |
| NRS3719         | 3610 <i>hag</i> T <sup>209</sup> C                                                                                       | pNW1010 →3610       |
| NRS3724         | 3610 <i>flgN</i> R <sup>49</sup> E                                                                                       | pNW1012 →3610       |
| NRS3735         | 168 <i>amyE::P<sub>hy-spank</sub>-flgKL-lacI (spc)</i>                                                                   | pNW1017 →168        |
| NRS4017         | 3610 <i>flgN</i> R <sup>60</sup> E                                                                                       | pNW1028 →3610       |
| NRS4041         | 3610 $\Delta$ <i>fliD</i>                                                                                                | pNW1034 →3610       |
| NRS4042         | 3610 $\Delta$ <i>flgE</i>                                                                                                | pNW1036 →3610       |
| NRS4043         | 3610 $\Delta$ <i>flgN</i> + <i>amyE::P<sub>hy-spank</sub>-flgKL-lacI (spc)</i>                                           | SPP1 3735 →NRS3570  |
| NRS4060         | 3610 $\Delta$ <i>flgKL</i>                                                                                               | pNW1042 →3610       |
| NRS4063         | 3610 <i>flgN</i> R <sup>60</sup> A                                                                                       | pNW1027 →3610       |
| NRS4064         | 3610 $\Delta$ <i>flgKL</i> + <i>amyE::P<sub>hy-spank</sub>-flgKL-lacI (spc)</i>                                          | SPP1 3735 → NRS4060 |
| NRS4071         | 3610 $\Delta$ <i>flgKL</i> + <i>sacA::P<sub>hag</sub>-yfp (kan)</i>                                                      | pNW1042 →NRS4060    |
| NRS4078         | 3610 $\Delta$ <i>flgKL</i> + <i>sacA::P<sub>hag</sub>-yfp (kan)</i> + <i>amyE::P<sub>hy-spank</sub>-flgKL-lacI (spc)</i> | SPP1 3735 → NRS4078 |
| NRS4794         | 168 <i>amyE::P<sub>hag</sub>-lacZ</i> translational ( <i>cml</i> )                                                       | pNW1069 →168        |
| NRS4795         | 3610 <i>amyE::P<sub>hag</sub>-lacZ</i> translational ( <i>cml</i> )                                                      | SPP1 4794 →3610     |
| NRS4796         | 3610 $\Delta$ <i>flgN</i> + <i>amyE::P<sub>hag</sub>-lacZ</i> translational ( <i>cml</i> )                               | SPP1 4794 →3570     |
| NRS4798         | 3610 $\Delta$ <i>flgE</i> + <i>amyE::P<sub>hag</sub>-lacZ</i> translational ( <i>cml</i> )                               | SPP1 4794 →4042     |
| NRS4799         | 3610 $\Delta$ <i>flgKL</i> + <i>amyE::P<sub>hag</sub>-lacZ</i> translational ( <i>cml</i> )                              | SPP1 4794 →4060     |
| NRS4801         | 3610 <i>His-flgK</i>                                                                                                     | pNW1063 →3610       |
| NRS4812         | 3610 <i>flgK-His</i>                                                                                                     | pNW1065 →3610       |

36

37 <sup>a</sup> Drug resistance cassettes are indicated as follows: *kan*, kanamycin resistance; *mls*,  
38 lincomycin/erythromycin resistance; *cml*, chloramphenicol resistance; and *spc*, spectinomycin  
39 resistance.

40

41 <sup>b</sup> The direction of strain construction is indicated with DNA or phage (SPP1) (→) recipient strain.  
42 B.S.G.C. is the *Bacillus* genetic stock centre.

43

44

45 Table S2. Plasmids used in this study.

| Plasmid     | Relevant Genotype <sup>a</sup>                                      | Source              |
|-------------|---------------------------------------------------------------------|---------------------|
| pDR111      | <i>amyE</i> integration plasmid ( <i>spc</i> )                      | (4)                 |
| pBL132      | <i>cml<sup>R</sup></i> cassette in pUC19                            | (5)                 |
| pBL165      | <i>amyE</i> integration plasmid <i>P<sub>spac-hy</sub>-gfp mut2</i> | (5)                 |
| pDR183      | <i>lacA</i> integration plasmid                                     | (5)                 |
| pKM3a       | <i>yfp amyE</i> integration plasmid                                 | Kind gift D. Rudner |
| pSAC-KAN    | <i>sacA</i> integration plasmid                                     | (6)                 |
| pEHISGFPTEV | Protein expression vector                                           | (7)                 |
| pDG1728     | <i>lacZ</i> reporter fusion plasmid, <i>amyE</i> integration        | (8)                 |
| pMAD        | In-frame markerless mutation plasmid                                | (9)                 |
| pNW380      | <i>flgN</i> coding region in pDR111                                 | This study          |
| pNW398      | <i>flgN</i> in pUC19                                                | This study          |
| pNW399      | $\Delta$ <i>flgN</i> in pMAD                                        | This study          |
| pNW546      | <i>P<sub>hag</sub>-yfp</i> in pSAC-KAN                              | This study          |
| pNW642      | <i>sigA</i> in pEHISGFPTEV                                          | This study          |
| pNW700a     | <i>P<sub>hag</sub></i> in pKM3a                                     | This study          |
| pNW800      | <i>flgN</i> Y <sup>49</sup> A in pUC19                              | This study          |
| pNW801      | <i>flgN</i> Y <sup>49</sup> A in pMAD                               | This study          |
| pNW1006     | <i>hag</i> in pBL132                                                | This study          |
| pNW1009     | <i>hag</i> T <sup>209</sup> C in pBL132                             | This study          |
| pNW1010     | <i>hag</i> T <sup>209</sup> C in pMAD                               | This study          |
| pNW1011     | <i>flgN</i> Y <sup>49</sup> E in pUC19                              | This study          |
| pNW1012     | <i>flgN</i> Y <sup>49</sup> E in pMAD                               | This study          |
| pNW1017     | <i>flgKL</i> coding region in pDR111                                | This study          |
| pNW1025     | <i>flgN</i> R <sup>60</sup> A in pUC19                              | This study          |
| pNW1026     | <i>flgN</i> R <sup>60</sup> E in pUC19                              | This study          |
| pNW1027     | <i>flgN</i> R <sup>60</sup> A in pMAD                               | This study          |
| pNW1028     | <i>flgN</i> R <sup>60</sup> E in pMAD                               | This study          |
| pNW1034     | $\Delta$ <i>fliD</i> in pMAD                                        | This study          |
| pNW1036     | $\Delta$ <i>flgE</i> in pMAD                                        | This study          |
| pNW1042     | $\Delta$ <i>flgKL</i> in pMAD                                       | This study          |
| pNW1063     | His- <i>flgK</i> in pMAD                                            | This study          |
| pNW1065     | <i>flgK</i> -His in pMAD                                            | This study          |
| pNW1069     | <i>P<sub>hag</sub></i> in pDG1728                                   | This study          |

46

47 <sup>a</sup> Drug resistance cassettes are indicated as follows: *cml*, chloramphenicol resistance and *spc*,  
48 spectinomycin resistance.

49 Table S3 Primers used in this study.

| Primer  | Target      | Sequence <sup>a</sup>                             | Position <sup>b</sup> |
|---------|-------------|---------------------------------------------------|-----------------------|
| DEN5    | <i>rRNA</i> | TCACGRCACGAGCTGACGAC                              | Internal 16S rRNA     |
| DEN7    | <i>rRNA</i> | ACTCCTACGGGAGGCAGC                                | Internal 16S rRNA     |
| NSW652  | <i>hag</i>  | CCG <u>GAATTC</u> GAATTGACGCCCAAAGCATATTG         | -272→-248             |
| NSW653  | <i>hag</i>  | GGCAAGCTTCTGAATATGTTGTTAAGGCACGTC                 | -38→-14               |
| NSW860  | <i>sigA</i> | GCATCCATGGCTGATAAACAAACCCACG                      | +5→+22                |
| NSW861  | <i>sigA</i> | GCATCTCGAGTTATTCAAGGAAATCTTTC                     | +1095→+1116           |
| NSW936  | <i>flgN</i> | GCATGGATCCATC AGG CAG AAG CGA ATT CAG             | -588→-558             |
| NSW937  | <i>flgN</i> | GCATTCTAGATAATTGCCTTCGCTGACATGG                   | +92→+123              |
| NSW938  | <i>flgN</i> | GCATTCTAGACTGTTTGT TCAAAAGCTTAGCAGAAAG            | +453→+490             |
| NSW939  | <i>flgN</i> | GCATGTCGACCAACACAGTTGTATTTAGCT TGC                | +1104→1137            |
| NSW940  | <i>flgN</i> | GCAT GTCGACAAGCAATAAAAAAGGAGAAAGCCC               | -34→-1                |
| NSW941  | <i>flgN</i> | GCATGCATGCAATTCCTTTCTGCTAAGCTTTTGAATC             | +469→+505             |
| NSW942  | <i>flgN</i> | ACAAAAGAGCAAAAAG <b>CA</b> ATTCAAGCAATCACG        | +130→+162             |
| NSW943  | <i>flgN</i> | CGTGATTGCTTGAATT <b>GC</b> TTTTTGCTCTTTTGT        | +130→+162             |
| NSW1401 | <i>hag</i>  | GCATGGATCCGCGATCTCTGAAAA                          | +39→+52               |
| NSW1402 | <i>hag</i>  | CGATGGATCCTCGTTTATATCGACTAAGT                     | +1103→1121            |
| NSW1403 | <i>hag</i>  | GCAGATAATGCAGCAGATT <b>GT</b> GCTGATATCGGTTTCGATG | +107→+147             |
| C       |             |                                                   |                       |
| NSW1404 | <i>hag</i>  | GCATCGAAACCGATATCAGC <b>CA</b> ATCTGCTGCATTATCTGC | +107→+147             |
| NSW1436 | <i>flgN</i> | ACAAAAGAGCAAAAAG <b>GA</b> ATTCAAGCAATCACG        | +130→+162             |
| NSW1437 | <i>flgN</i> | CGTGATTGCTTGAAT <b>TTCT</b> TTTTTGCTCTTTTGT       | +130→+162             |
| NSW1438 | <i>yvyF</i> | GAAAACCGCAATCAACTTTGAGC                           | +133→+156             |
| NSW1439 | <i>yvyF</i> | CTCGTGGTTCAAATGATCCATTTGATC                       | +322→+348             |
| NSW1440 | <i>flgM</i> | ATCAATCAATTTGGAACACAATCCG                         | +7→+31                |
| NSW1441 | <i>flgM</i> | GTCTACTTTGTATGACCCGTTTTTC                         | +196→+216             |
| NSW1442 | <i>flgN</i> | GCC GGC AAAACAAAAGAGCTTTCT                        | +97→+120              |
| NSW1443 | <i>flgN</i> | TCCGAGAACTTGAGAAAGAGATTCGTA                       | +283→+309             |
| NSW1444 | <i>flgK</i> | TACAACAAATCAGGCGGGAATGCA                          | +682→+705             |
| NSW1445 | <i>flgK</i> | AGACTCTATAAACCCATAAAAGGGATCCC                     | +894→+921             |
| NSW1446 | <i>flgL</i> | CAAGCGATTGGCGTAGAGGTA                             | +322→+344             |
| NSW1447 | <i>flgL</i> | GCCTCCAAAAGCTGACTTTGGATC                          | +526→+549             |
| NSW1459 | <i>yviE</i> | CTGCTCATTTTTAAGCTGGC                              | +64→+83               |
| NSW1462 | <i>flgK</i> | GCATGTCGACTTAGCAGAAAGGAATT                        | -22→-6                |
| NSW1463 | <i>flgL</i> | GACTGCATGCTTACTTTAAAAAGTCAAT                      | +880→+897             |
| NSW1464 | <i>flgN</i> | CAGACAGAAGATGAC <b>GCG</b> ATCAAAACAACCTCG        | +163→+193             |
| NSW1465 | <i>flgN</i> | CGAAGTTGTTTTGAT <b>CGCG</b> TCATCTTCTGTCTG        | +163→+193             |
| NSW1466 | <i>flgN</i> | CAGACAGAAGATGAC <b>GAG</b> ATCAAAACAACCTCG        | +163→+193             |
| NSW1467 | <i>flgN</i> | CGAAGTTGTTTTGAT <b>CTC</b> GTCTCTTCTGTCTG         | +163→+193             |
| NSW1670 | <i>hag</i>  | GCAGGATCCAAGAAGAACAATCATTCTTTTGAAG                | -766→-727             |
| NSW1671 | <i>hag</i>  | TTGCGGTCGACGTGGTTAATTCTCATTGTTTTGTTCCCT           | -12→+25               |

50 <sup>a</sup> Underlined sequences indicate endonuclease restriction cut sites. Bold sequences represent base pairs  
51 mutated by site-directed mutagenesis.

52  
53 <sup>b</sup> Position of primer is indicated in relation to the translational start site (noted as +1) of the named gene.

54

55

56 **Table S4. Mass spectrometry analysis of top 12 proteins identified from hook-basal body enrichment of**  
 57 **NCIB3610.** The top 12 proteins from the NCIB3610 sample are presented as identified by their Mascot protein  
 58 score.

| Protein Rank | Protein Description                                                                   | Mascot Protein Score | Coverage (%) | Unique Peptides | No. Peptides |
|--------------|---------------------------------------------------------------------------------------|----------------------|--------------|-----------------|--------------|
| 1            | flagellin [Bacillus subtilis subsp. subtilis str. 168]                                | 13717.54             | 96.71        | 38              | 45           |
| 2            | flagellar basal body rod protein FlgG [Bacillus subtilis subsp. subtilis str. 168]    | 6251.24              | 96.97        | 27              | 27           |
| 3            | elongation factor Tu [Bacillus subtilis subsp. subtilis str. 168]                     | 6107.34              | 92.42        | 38              | 38           |
| 4            | surfactin synthetase [Bacillus subtilis subsp. subtilis str. 168]                     | 3582.23              | 34.80        | 84              | 104          |
| 5            | surfactin synthetase [Bacillus subtilis subsp. subtilis str. 168]                     | 3267.57              | 38.44        | 77              | 97           |
| 6            | flagellar MS-ring protein [Bacillus subtilis subsp. subtilis str. 168]                | 3254.30              | 70.34        | 32              | 32           |
| 7            | flagellar hook-associated protein FlgK [Bacillus subtilis subsp. subtilis str. 168]   | 2784.52              | 73.77        | 27              | 27           |
| 8            | putative flagellin [Bacillus subtilis subsp. subtilis str. 168]                       | 2249.41              | 48.75        | 1               | 11           |
| 9            | glyceraldehyde-3-phosphate dehydrogenase [Bacillus subtilis subsp. subtilis str. 168] | 1957.55              | 54.63        | 15              | 15           |
| 10           | 30S ribosomal protein S2 [Bacillus subtilis subsp. subtilis str. 168]                 | 1776.43              | 84.55        | 26              | 26           |
| 11           | flagellar capping protein [Bacillus subtilis subsp. subtilis str. 168]                | 1765.60              | 63.25        | 29              | 29           |
| 12           | flagellar hook-associated protein FlgL [Bacillus subtilis subsp. subtilis str. 168]   | 1693.66              | 67.45        | 16              | 16           |

59

60 **Plasmid Construction.**

61 **Construction of Plasmid pNW546.** Plasmid pNW546 was constructed to assay *hag* transcription  
62 using YFP as a reporter. The promoter region of *hag* was PCR amplified from *B. subtilis* 3610  
63 chromosomal DNA using primers NSW652 and NSW653 and ligated into pKM3a using EcoRI and  
64 HindIII restriction sites to create pNW700a. pNW700a was digested with EcoRI and BamHI to release  
65 the *Phag-yfp* fragment which was ligated into pSAC-KAN (6), to allow for integration at the non-  
66 essential *sacA* locus.

67 **Construction of Plasmid pNW1017.** Plasmid pNW1017, used to introduce the *flgK* and *flgL* coding  
68 regions under the control of the IPTG-inducible promoter  $P_{hy-spank}$  at the non-essential *amyE* locus, is  
69 a derivative of pDR111 (4). The coding regions of *flgK* and *flgL* (including ribosome binding site) and  
70 the intergenic region were amplified from *B. subtilis* 3610 chromosomal DNA with primers NSW1462  
71 and NSW1463. The PCR product was digested Sall/SphI and cloned into pDR111 cut the same.  
72 Plasmid pNW380 for *flgN* was constructed in an identical manner using primers NSW940 and  
73 NSW941.

74 **Construction of Plasmid pNW1069.** Plasmid pNW1069 was constructed to introduce a *hag'*-*lacZ*  
75 translational reporter fusion at the non-essential *amyE* locus. The *hag* promoter, the *hag* 5'UTR and  
76 the 5' end of the *hag* open reading frame (10) were amplified by PCR with the primers NSW1670 and  
77 NSW1671 from *B. subtilis* 3610 chromosomal DNA. The PCR product was digested BamHI/Sall and  
78 cloned into the BamHI and Sall sites of pDG1728 (8).

79 **Construction of Plasmid pNW1034.** Plasmid pNW1034 was constructed to introduce an in-frame  
80 markerless deletion of *fliD* to the chromosome. A region of approximately 1000 bp, including 500bp  
81 upstream of *fliD*, the first two codons and final two codons of *fliD*, and 500 bp downstream of *fliD*  
82 was synthesised and cloned into a pUC cloning plasmid by Dundee Cell Products  
83 (<http://www.dundeecellproducts.com/>). The  $\Delta fliD$  region was excised from the pUC plasmid with  
84 EcoRI and BamHI and cloned into the EcoRI and BamHI sites of pMAD (9). Plasmid pNW1036 and  
85 pNW1042 were constructed in a similar manner. Synthesised sequences are detailed below.  
86 Restriction sites are underlined and the first two codons and final two codons of each gene deleted  
87 are highlighted in bold.

88 **Construction of pNW1063.** Plasmid pNW1063 was constructed to introduce a poly-Histidine epitope  
89 tag at the N-terminus of *flgK*. A region of approximately 1000 bp including 500bp upstream of the  
90 *flgK* transcriptional start site, the *flgK* start codon, a region encoding 10 Histidine residues and 500bp  
91 downstream of the *flgK* transcriptional start site was synthesised and cloned into a pUC cloning

92 plasmid by GenScript (<http://www.genscript.com/>). The His-*flgK* region was excised from the pUC  
93 plasmid with BamHI and cloned into the BamHI site of pMAD (9). pNW1065 was constructed in a  
94 similar manner. Synthesised sequences are detailed below. Restriction sites are underlined and His  
95 tag regions highlighted in bold underline.

96 **Regions of DNA synthesised for cloning into pMAD.**

97 *ΔfliD* used to construct pNW1034

98 GAATTCACAAGAAATCTAAAACAGAAGATTTTTTTCCAAAAATATGTGTAATCTTATCTCGACTTAGT  
99 CGATATAAACGATAGATTGGGGCATAGGGGATGATCAATTGAACATTGAAAGGCTCACTACGTTACAA  
100 CCTGTTTGGGATCGTTATGATACTCAAATACATAATCAGAAAAGATAATGATAACGAGGTTCTGTTCA  
101 TCAAGTTTCATATACCAATCTTGCTGAAATGGTGGGGGAAATGAACAAGCTTTTGGAACCTTCGCAAG  
102 TTCATCTGAAGTTCGAGCTTCATGACAAGTTAAATGAATACTATGTAAAGGTAATAGAGGACTCTACA  
103 AATGAAGTGATCCGCGAAATTCACCAAACGGTGGCTTGATTTTTATGCGGCTATGACTGAATTTCT  
104 TGGGTTATTTGTAGATGAAAAAAGTAGAATAGGAGTGGTTTGAG**ATGGTCCAATAAA**TGTAATTTGG  
105 AGGATGACACATGGCGATCCAAAATCCATATACAGCCTATCAGCAAATTCAGTGAATACGGCTACAC  
106 CCGGGGAGCTGACGCTTATGCTGTATAATGGCTGTTTGAAATTTATAAGACTTGCCGCTCAGGCCATT  
107 GAGAATGATGATATGGAACGTAAAAATGAAAATCTGATTAAAGCGCAAAATATTATTCAGGAATTTAA  
108 TTTTACACTTAACCGTAACATAGAGCTTTCCGCTTCTATGGGTGCGATGTACGATTATATGTATCGCA  
109 GATTGGTACAGGCAAATATCAAAAATGATACGGGCATGCTGGCTGAGGTTGAAGGTTATGTAACAGAT  
110 TTTTCGCGATGCTTGAAACAAGCCATTCAAAGTGAGCGGAAGGACCGGCACGGATCAGGCGGGATCGC  
111 ATGAATAATATAGATCAACTATACACTGAGACGAAGAGTATGCTGTACACATACAAAAACGCCGGA  
112 AAGCGATGAACTTTTAAAGCAAATGAAGACTTTGTGGCTACACGGTCTGAACTGATTCAGGAGATAT  
113 CTCTGCCGCTTTCAGGATCC

114 *ΔflgE* used to construct pNW1036

115 GAATTCATGACTTCTATAAGTTCAGAATATAAACTGCCTGAAAAACGAACACTGTGTGCGACGAACAA  
116 CAGCAGCTTGGGGAAAGACGAGTTTTTAAAAATATTAATGACTCAAGTTCAAACCAAGATCCGCTTA  
117 ACCCGATTGACGATAAAGAATTTATCAGCCAGATGGCGACTTTTTCAAGCTTGGAGCAAATGATGAAT  
118 CTGAATACGACAATGACTCAATTCGTTGAAAACCAAGATCCGTTTACAACGTATGTTGATTGGATGGG  
119 AAAAGAAGTATCTTGGACTGATGGTAAAAGTGAACAGATAAAACAGGCACAGTAAGCTCTGTTAAAC  
120 ATTTTAAAGGAAATATTATCTCGTTCTTGATGATGGGACCGAGATCAGTCTGCGAATGTCATGTCT  
121 GTGGGACAATCATCTAAATAAAAACATCTGGGGGAATATAT**ATGTTACGTTAA**GGAGGGAGGGGAGG  
122 CGAGTAATCGCTTCTCCGCTGTTTTATGATTAAAGTAACCCGTTTGAACGGGCAGCCCTTTACTACTGA  
123 ATGCGCTATTTATTGAACAGATTGAATGTTTTCCGGATACTACAATTACTCTGTCAAATGGTAAGAAG  
124 TTTGTAGTAAAAGAAGATGAAGAAGCTGTTCTGGAAAAGATCGCAGCTTCTACCGAAAAATACAAAT  
125 ATTTGCAATGGATCAAGGAATAGAGGAACCGGAATGAAGAAAAAGTTAATGATCATATTACTAATTAT  
126 TCTTATCGTAATTGGTGTCTCGGGCGGGCGCTTATTTTTGTTTTAGGCGAAAGTCCGAAAAAAGTG  
127 AAGCGAAAAAAGTATTGATGAAATCGTTGCGTCTTCTGTTGATGTAGAAGAGATCACACAAATTTA  
128 AAGTCTGATAACATTATCCGCTTGCTATTAACTTGAACTGATTCTGATAAATCAAAAAGAAGAACT  
129 TGAGAAACGTGATTTCCAAGTGAAAGACGCTGTTATATCACTGCTGGCTGATACGAATGCTGGGATCC

130 *ΔflgKL* used to construct pNW1042

131 GGATCCTGTGTCAGCGAAGGCAATTATTGAACAATTGAAGCGACTTTGCGTTCTGCATGAGCACCTGCTC  
132 ACGCTGTCTGAAGAAAAGACGGAAGCGCTCAAAGCCGGCAAAACAAAAGAGCTTTCTAACATTTTGAC  
133 AAAAGAGCAAAAATATATTCAAGCAATCACGCAGACAGAAGATGACCGGATCAAACAACCTTCGGCCT



134 TTCTCGGATATAGCGAAAATAATACTATTTCCGCATGTATCGCCAAAACCTCAGGCAGTGAAAAGGAA  
135 GAGCTGGAACAAC TATACGAATCTCTTTCTCAAGTTCTCGGACGTCTGAAAAAAGTAAATGAGATGAA  
136 TAGGCAGCTGACAAGAGACGCGCTGCAATTCATCTCTATTTTCGTACGATATGCTGGTTCCTAAGGAAA  
137 ATAAC T TCAATTACAGCAAATCAATTAAGCTGAGCTGCCGAAAAGTAGCAAATGAAACTGTTTTGAT  
138 TCAAAAAGCTTAGCAGAAAGGAATTCAGAAAATGACAAAGTAAAGCGGCTCTTAGGAGTTCGCTTTTTTTT  
139 ATAGTTCAGGAGGTAGAGTGATGCAGATTCCAGATTGATTATGCATAGTGTTC AAGGAAAAATTGGT  
140 TTAACAACGACGCCTGCCAGCTTAAAAATGGAGCAGCCTCAAGCTGATCTAGAGATCGAACAGCCGAG  
141 TGCGGAAATGGAAATATCGGTGACACCTGGAAAACCTCACGATTGACCAGACACAAGCATGGGAAGAAT  
142 TAGACAGAAAAGCATGTTTTCAAGAGAATTGAAGAAGCCGCCAAC AAGGGCATGAGGATGTAATGGAG  
143 GG AATAGCACGCACTGCAGAAGAAGGCGACGAGCTTATGAAGATTGAAAAAAGGGGAAACCAATCGC  
144 TTCACAAGCAAGGAGGA ACTCTGAAATGCACCAAATTCAATTAGGCGAAAATTATGCTCCTTCTCTTT  
145 CGAGGGTGAAAATACAATATACTCCGTACAGCTTGATGTGCAGATTACGCCGCGAAAAGCCTGGGATC  
146 C

147 *His-flgK* used to construct pNW1063

148 GGATCCCCATGTCAGCGAAGGCAATTATTGAACAATTGAAGCGACTTTGCGTTCTGCATGAGCACCTG  
149 CTCACGCTGTCTGAAGAAAAGACGGAAGCGCTCAAAGCCGGCAAACAAAAGAGCTTTCTAACATTTT  
150 GACAAAAGAGCAAAAATATATTCAAGCAATCACGCAGACAGAAGATGACCGGATCAAACAAC TTCGG  
151 CCTTTCTCGGATATAGCGAAAATAATACTATTTCCGCATGTATCGCCAAAACCTCAGGCAGTGAAAAG  
152 GAAGAGCTGGAACAAC TATACGAATCTCTTTCTCAAGTTCTCGGACGTCTGAAAAAAGTAAATGAGAT  
153 GAATAGGCAGCTGACAAGAGACGCGCTGCAATTCATCTCTATTTTCGTACGATATGCTGGTTCCTAAGG  
154 AAAAATAACTTCAATTACAGCAAATCAATTAAGCTGAGCTGCCGAAAAGTAGCAAATGAAACTGTTT  
155 GATTCAAAAGCTTAGCAGAAAAGGAATTCAGAAAATG**CATCACCATCACCATCACCATCACCATCACAC**  
156 ATCTACCTTTATGGGGCTTGAAACTGCAAGGCGGGCGTTAAGCGCTCAGCAGGCAGCGTTAAGCACTA  
157 CTGCAAATAACGTGGCAAATGCCAATACTGATGGTTATAACAAGACAGCGGGTCTCATTGGAGGCAACT  
158 GACTATTTCCCTGCTGTATCTAAAAATGCAGAAAAAACAGCGGGACAAATGGGTACGGGCGTTCAAGG  
159 AAAATCAGTTGAGAGAATAAGAGATATCTTTCTTGACTACCAATACCGTCTTCAAACAACAGTGCCG  
160 GATACTATGACACGAAGGCAAAGCGCTGTCCCAATGG AAGGCGTTTTAAATGAAACGGATGACAGC  
161 GGCTTGAACAGTGTGCTCAATTCGTTTTGGAATTCCTGCAGGAATTATCGAATAATACAAATGAAGA  
162 AAGTGCACGTTCTGTTGTTGCTCGAAAAGGACAAGCTGTAGCTGAAACGTTTAATTATATTTCTGAAT  
163 CACTTACAAATGTCCGGATCC

164 *flgK-His* used to construct pNW1065

165 GAATTCGAAGTGCACAGAAATGGTGTGACCAAGAGCGGTGAACAAGGCGGAGACTTTTTTGATTTTAC  
166 TGGCGGTGAAACTGAACCTGCCAAGGGCGCGGCGGGCAAGATCAAAGTGGCTGACAGCATAATAGATT  
167 CAAAAGGCGCAAACATTGCTTTCTCACTGACTGGCGCAGCCAACGATAACGCAAATGCTACAAAATTA  
168 GCAAATGTTTTAACCGGTAAAATAACCATTAACGGTAAAGAACTAGTGTTTTAGATTATTATGCGGG  
169 TCTGATTGGCGAGCTAGGGATCGAAGCTCAAGAGGCTAATCGACTGGCGTCTAATACAGAAACACAGC  
170 TGAATGATGCTGACATAAACCGTCAGCAAATGAGCGCAGTTTCTTTAGACGAAGAAATGACGAATATG  
171 ATTCAATTCCAACACGCATACAATGCAGCTGCAAGAATGGTGACTTTACAAGACGAATTGCTTGATAA  
172 AGTGATCAACGGCATGGGTGTTGGAGGAAGGGGAGCAGGAC**CATCACCATCACCATCACCATCACCATC**  
173 **ACT**AGTGGGTGTTGGAGGAAGGGTAGAGTCACATGAGAGTAACACAAGGCATGATACAGCAAACCTCA  
174 CTGAGATATATCGGTTCAAGCTACTCGAAGCTGGATAAACTCCAGTGCAGATTTCTTCAGGAAAAAA  
175 AATCTCAAAGCTTCCGACGATCCTGTAGTAGCAATGAAAAGCTTAAAGTATAATACGCAACTGTCTC  
176 AAGTGCAGCAGTACAAAAGCAATGCTTCTCAAGCCTTACCTGGCTCGAAAACACAGAAACAAACATT  
177 ACAGAAGGAATTGACATCTTGTCAAAGGTCAGAGAATTAGCGGTTGAAGCTCAAATGATACAAACGG  
178 CGAGCCGGAGCGGCAAGCGATTGGCGTAGAGGTAAAGCAGTTAAAGGAACAGCTTTTAAATATTGCGA

179 ATACACAAGTGAACGGCAGATATATCTTTAATGGCACAAATTCAGATAAGCCTCCGGTTACAGATAAC  
180 GGAGACGGAACTTATACGGATCC  
181

182 **References.**

- 183 1. **Perego M, Hoch JA.** 1988. Sequence analysis and regulation of the *hpr* locus, a regulatory  
184 gene for protease production and sporulation in *Bacillus subtilis*. *J Bacteriol* **170**:2560-2567.
- 185 2. **Verhamme DT, Kiley TB, Stanley-Wall NR.** 2007. DegU co-ordinates multicellular behaviour  
186 exhibited by *Bacillus subtilis*. *Mol Microbiol* **65**:554-568.
- 187 3. **Kiley TB, Stanley-Wall NR.** 2010. Post-translational control of *Bacillus subtilis* biofilm  
188 formation mediated by tyrosine phosphorylation. *Mol Microbiol* **78**:947-963.
- 189 4. **Britton RA, Eichenberger P, Gonzalez-Pastor JE, Fawcett P, Monson R, Losick R, Grossman  
190 AD.** 2002. Genome-wide analysis of the stationary-phase sigma factor (Sigma-H) regulon of  
191 *Bacillus subtilis*. *Journal of Bacteriology* **184**:4881-4890.
- 192 5. **Stanley NR, Britton RA, Grossman AD, Lazazzera BA.** 2003. Identification of catabolite  
193 repression as a physiological regulator of biofilm formation by *Bacillus subtilis* by use of DNA  
194 microarrays. *J Bacteriol* **185**:1951-1957.
- 195 6. **Middleton R, Hofmeister A.** 2004. New shuttle vectors for ectopic insertion of genes into  
196 *Bacillus subtilis*. *Plasmid* **51**:238-245.
- 197 7. **Liu H, Naismith JH.** 2009. A simple and efficient expression and purification system using  
198 two newly constructed vectors. *Protein Expr Purif* **63**:102-111.
- 199 8. **Guerout-Fleury AM, Frandsen N, Stragier P.** 1996. Plasmids for ectopic integration in  
200 *Bacillus subtilis*. *Gene* **180**:57-61.
- 201 9. **Arnaud M, Chastanet A, Debarbouille M.** 2004. New vector for efficient allelic replacement  
202 in naturally nontransformable, low-GC-content, gram-positive bacteria. *Appl Environ  
203 Microbiol* **70**:6887-6891.
- 204 10. **Mukherjee S, Yakhnin H, Kysela D, Sokoloski J, Babitzke P, Kearns DB.** 2011. CsrA-FliW  
205 interaction governs flagellin homeostasis and a checkpoint on flagellar morphogenesis in  
206 *Bacillus subtilis*. *Mol Microbiol* **82**:447-461.

207

208

209

210 Figure S1

211

MRINHNIAALNTLNRLSSNNSASQKNMEKLSGLRINRAGDDAAGLAISEKMRGQIRGLEMASKNSQDGISLIQTA  
EGALTETHAILQRVRELVVQAGNTGTQDKATDLQSIQDEISALTDEIDGISNRTEFNGKLLDGTYSKVDATPANQ  
KNLVFQIGANATQQISVNIEDMGADALGIKEADGSIAALHSVNDLDVTKFADNAADTADIGFDAQLKVVDEAINQV  
SSQRAKLGAVQNREHTINLSASGENLTAAESRIRDVDMAKEMSEFTKNNILSQASQAMLAQANQQPQNVLQLLR

212

213

214

215 Figure S2.

216

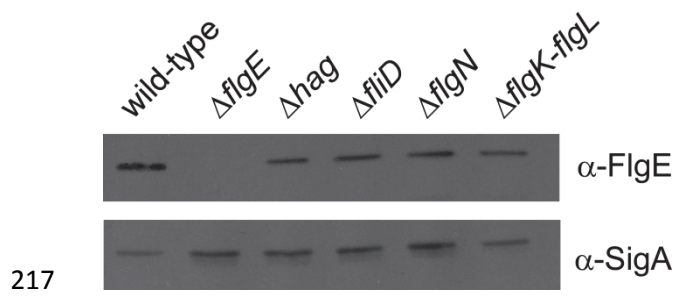

218 Figure S3

A.

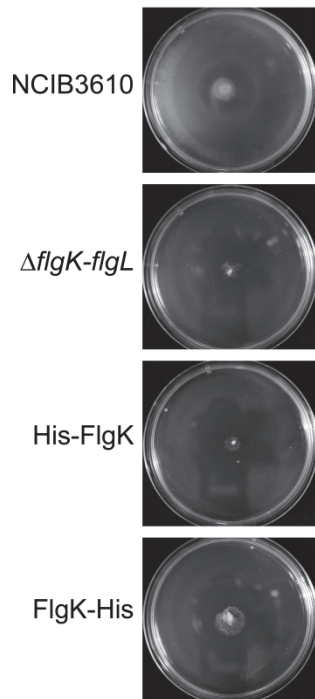

B.

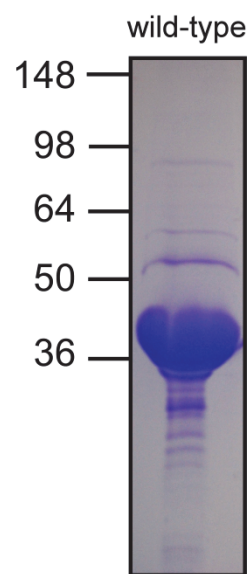

219

220
